# Supplementary material for: Harnessing climate services to support community resilience planning: lessons learned from a community-engaged approach to assessing NOAA’s National Water Model
Source: Frontiers journal article supplement (doi:10.3389/fclim.2024.1291165), 2024-04-04
Supplement: Data_Sheet_3.pdf [file Data_Sheet_3.pdf]

## **APPENDIX C: Resilience-related plan title summary**

### **Harnessing Climate Services to Support Community Resilience Planning: Lessons learned from a community-engaged approach to assessing NOAA's National Water Model**

**Kristin B. Raub<sup>1,2\*</sup>, Joshua Laufer<sup>2</sup>, Stephen E. Flynn<sup>2</sup>, Shemilore Daniels<sup>2</sup>, Trissha Sivalingam<sup>2</sup>**

<sup>1</sup> Consortium of Universities for the Advancement of Hydrologic Science, Inc., Arlington, MA, United States.

<sup>2</sup> Global Resilience Institute, Northeastern University, Boston, MA, United States.

**Table 7.** A summary of the types of plans discussed in the context of resilience and planning as it relates to water-related vulnerabilities.

| <b>Community</b>  | <b>Existing Water-Related Resilience Plans</b>                                                                                                                                                                                                                                                                                                                                                                                                                                                                                                                                                                                                                                                                                                                                                                                                                                                                                                                                                                                                                                                                      |
|-------------------|---------------------------------------------------------------------------------------------------------------------------------------------------------------------------------------------------------------------------------------------------------------------------------------------------------------------------------------------------------------------------------------------------------------------------------------------------------------------------------------------------------------------------------------------------------------------------------------------------------------------------------------------------------------------------------------------------------------------------------------------------------------------------------------------------------------------------------------------------------------------------------------------------------------------------------------------------------------------------------------------------------------------------------------------------------------------------------------------------------------------|
| <b>Burlington</b> | <ul style="list-style-type: none"> <li>• <u>Local/State Hazard Mitigation Plan</u> (2019; County-wide Burlington Hazard Mitigation Plan)</li> <li>• <u>Climate Action Plan</u> (2020; City of Burlington)</li> <li>• <u>Tactical Basin Plan</u> (2019; 15 basins throughout VT)</li> <li>• <u>River Corridor Plan</u> (2010; state-wide)</li> <li>• <u>Functioning Floodplains Plan</u> (2021; state-wide)</li> <li>• <u>Hampton New Hampshire 2021 Master Plan Update Coastal Resilience Report</u></li> <li>• <u>Vermont Lake Champlain Community Action Plan</u> (2022)</li> <li>• <u>Capital Improvement Plan</u> (2023; watermain, sewer, and stormwater rehabilitations)</li> <li>• <u>Nature Based Climate Solutions Plan</u> (2021; city-wide)</li> </ul>                                                                                                                                                                                                                                                                                                                                                   |
| <b>Cincinnati</b> | <ul style="list-style-type: none"> <li>• <u>Source Water Protection Plan</u> (2017; Ohio River Basin)</li> <li>• <u>Capital Investment Plan</u> (2016; infrastructure development)</li> <li>• <u>Local-Hazard Mitigation Plan</u> (2023; Hamilton County)</li> <li>• <u>Metro Transportation Plan</u></li> <li>• <u>Strategic Regional Policy Plan</u> (2005, 2014; Ohio, Kentucky, Indiana)</li> <li>• <u>Green Cincinnati Plan</u> (2023)</li> <li>• <u>Watershed (Clean H2O40) Plan</u> (Kentucky Sanitation District 1)</li> </ul>                                                                                                                                                                                                                                                                                                                                                                                                                                                                                                                                                                              |
| <b>Portland</b>   | <ul style="list-style-type: none"> <li>• <u>Natural Hazard Mitigation Plan</u> (2017; Multnomah County)</li> <li>• <u>Vancouver Climate Adaptation Strategy</u> (2022, Washington State)</li> <li>• <u>Watershed Management Plan</u> (2005-2010; city-wide)</li> <li>• <u>Oregon DLCD Tsunami Evacuation Facility Improvement Plans:</u><br/><a href="https://www.oregon.gov/lcd/ocmp/pages/tsunami-planning.aspx">https://www.oregon.gov/lcd/ocmp/pages/tsunami-planning.aspx</a></li> <li>• <u>Citywide Climate Action Plan</u> (2015; Multnomah County)</li> <li>• <u>Climate Resiliency and Recommendations</u> (City of Portland Bureau of Environmental Services, 2019)</li> <li>• <u>Southwest Community Growth Plan</u> (2000; Southwest Portland)</li> <li>• <u>Johnson Creek Restoration Plan</u> (2001)</li> <li>• <u>Community Wildfire Protection Plan</u> (Baker, Benton, Clackamas, Clatsop, Columbia, Coos, Crook, Curry, Deschutes, Douglas, Gilliam, Grant, Harney, Hood River, Jackson, Jefferson, Josephine, Klamath, Lake, Lane, Lincoln, Linn, Malheur, Marion, Morrow, Multnomah,</li> </ul> |

|                    |                                                                                                                                                                                                                                                                                                                                                                                                                                                                                                                                                                                                                                                                                                                                                                                                                                                                                                                           |
|--------------------|---------------------------------------------------------------------------------------------------------------------------------------------------------------------------------------------------------------------------------------------------------------------------------------------------------------------------------------------------------------------------------------------------------------------------------------------------------------------------------------------------------------------------------------------------------------------------------------------------------------------------------------------------------------------------------------------------------------------------------------------------------------------------------------------------------------------------------------------------------------------------------------------------------------------------|
|                    | <p>Polk, Sherman, Tillamook, Umatilla, Union, Wallowa, Wasco, Washington, Wheeler, and Yamhill counties)</p> <ul style="list-style-type: none"> <li>• <a href="#">USACE Plan</a> (2020; Portland Metro-area Levee System)</li> <li>• <a href="#">Floodplain/ Flood Emergency Resilience Plan</a> (2023)</li> <li>• <a href="#">Green House Gas Emissions Plan</a> (2020; state-wide)</li> <li>• <a href="#">City Comprehensive Emergency Management Plan</a> (2021)</li> <li>• <a href="#">Tualatin Watershed Enhancement Collaborative Plan</a> [TWEC] (2019; Cedar Mill/North Johnson Creek)</li> <li>• <a href="#">Blue River Park Wildfire Recovery Master Plan</a> (2023)</li> <li>• <a href="#">Sea Level Rise Plan</a> (2022; Coastal Oregon)</li> </ul>                                                                                                                                                           |
| <b>Charlotte</b>   | <ul style="list-style-type: none"> <li>• <a href="#">North Carolina Climate Risk Assessment and Resilience Plan</a> (2020)</li> <li>• <a href="#">North Carolina Enhanced Hazard Mitigation Plan</a> (2023)</li> <li>• <a href="#">Multi-Jurisdictional Hazard Mitigation Plan</a> (Mecklenburg County)</li> <li>• <a href="#">All-Hazards Plan</a> (Carteret County, Harnett County)</li> <li>• <a href="#">Climate Risk Assessment and Resiliency Plan</a> (state-wide)</li> <li>• <a href="#">Climate Resiliency Plan</a> (Cumberland County)</li> <li>• <a href="#">Flood Risk Assessment and Reduction Community Guidebook</a> (2021)</li> </ul>                                                                                                                                                                                                                                                                     |
| <b>Boulder</b>     | <ul style="list-style-type: none"> <li>• <a href="#">2020 Colorado Resiliency</a> [Framework]</li> <li>• <a href="#">Multi-Hazard Mitigation Plan</a> (2016; Boulder County)</li> <li>• <a href="#">Colorado Water Plan</a> (2023)</li> <li>• <a href="#">Statewide Transportation Plan</a> (2045)</li> <li>• <a href="#">Urban Storm Drainage Criteria</a> [Manual]</li> <li>• <a href="#">Water Utility Master Plan</a> (City of Boulder)</li> <li>• <a href="#">City of Boulder Drought Plan</a> (2022)</li> <li>• <a href="#">Hazard Mitigation Plan</a> (2022; City and County of Denver)</li> <li>• <a href="#">The Keep it Clean Strategic Plan</a> (Boulder County, Boulder, Longmont, Louisville, Lafayette, Superior, and Superior County)</li> <li>• <a href="#">Comprehensive Flood and Stormwater Master Plan</a> (2022; City of Boulder)</li> </ul>                                                         |
| <b>Minneapolis</b> | <ul style="list-style-type: none"> <li>• <a href="#">Climate Change Vulnerability Assessment and Adaptation Plan</a> (of the 1854 Ceded Territory; Including the Bois Forte, Fond du Lac, and Grand Portage Reservations)</li> <li>• <a href="#">One Watershed, One Plan</a> (2016)</li> <li>• <a href="#">MN Department of Natural Resources Flood preparation, response, and recovery roles of local officials</a> (<a href="https://www.dnr.state.mn.us/climate/floods/index.html">https://www.dnr.state.mn.us/climate/floods/index.html</a>)</li> <li>• <a href="#">Hennepin County All-Jurisdiction Hazard Mitigation Plan</a> (2018)</li> <li>• <a href="#">Climate Action Plan</a> (2013)</li> <li>• <a href="#">Climate Action Plan</a> (Hennepin County)</li> <li>• <a href="#">State of Minnesota Hazard Mitigation Plan</a> (2019)</li> <li>• <a href="#">Freshwater Strategic Plan</a> (2020-2025)</li> </ul> |
| <b>Houston</b>     | <ul style="list-style-type: none"> <li>• <a href="#">Texas State Flood Plan</a> (forthcoming)</li> <li>• <a href="#">Texas Coastal Resiliency Master Plan</a> (2019)</li> <li>• <a href="#">City of Rockport Comprehensive Plan 2022-2042</a></li> <li>• <a href="#">Resilient Houston</a> (2020)</li> <li>• <a href="#">Southeast Texas Flood Coordination Study</a> (Lamar University, forthcoming)</li> </ul>                                                                                                                                                                                                                                                                                                                                                                                                                                                                                                          |
